# Supplementary material
Source: PubMed Central journal article supplement (PMC7364704)
Supplement: ao0c01613_si_001.pdf [file ao0c01613_si_001.pdf]

# **Effective adsorptive removal of methylene blue from water by didodecyldimethylammonium bromide-modified brown clay**

Muhammad Munir<sup>a</sup>, Muhammad Faizan Nazar<sup>a\*</sup>, Muhammad Nadeem Zafar<sup>a\*</sup>, Muhammad Zubair<sup>a</sup>, Muhammad Ashfaq<sup>a</sup>, Ahmad Hosseini-Bandegharai<sup>b,c</sup>, Salah Ud-Din Khan<sup>d</sup>, Ashfaq Ahmad<sup>e</sup>

<sup>a</sup>Department of Chemistry, University of Gujrat, Gujrat, 50700 Pakistan

<sup>b</sup>Department of Environmental Health Engineering, Faculty of Health, Sabzevar University of Medical Sciences, Sabzevar, Iran

<sup>c</sup>Department of Engineering, Kashmar Branch, Islamic Azad University, PO Box 161, Kashmar, Iran

<sup>d</sup>Sustainable Energy Technologies Center, King Saud University, P.O. Box 800, Riyadh 11421, Saudi Arabia

<sup>e</sup>Department of Chemistry, King Saud University, P.O. Box 2425, Riyadh 11451, Saudi Arabia

## **Supporting Information**

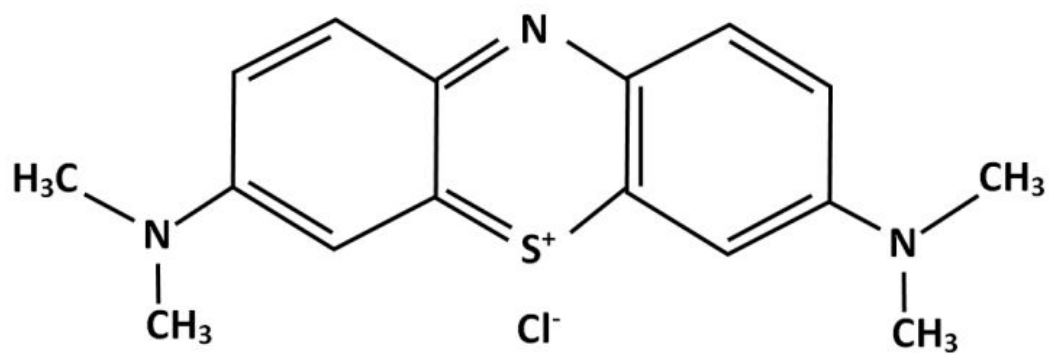

**Figure S1.** Molecular structure of methylene blue (MB) dye

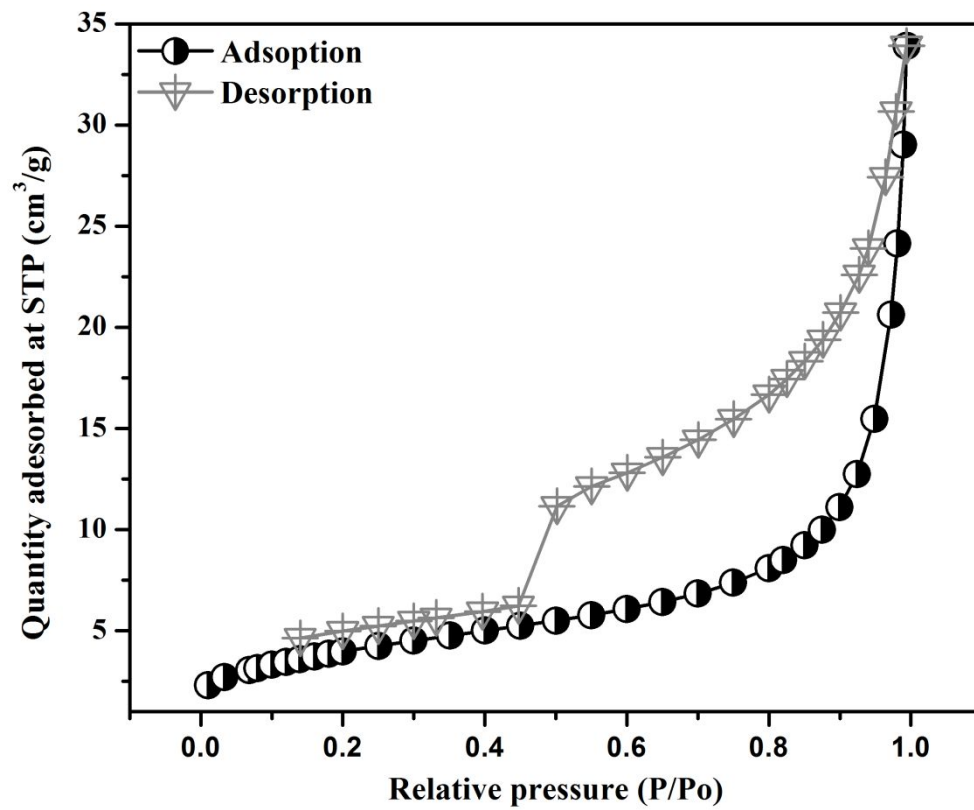

Figure S2. BET isotherm plot of BC sorbent

**Table S1. BET surface parameters of BC and DDAB-BC**

| Parameters    | Values                      |
|---------------|-----------------------------|
| BC            |                             |
| Surface area  | 14.5884 m <sup>2</sup> /g   |
| Pore diameter | 10.16264 nm                 |
| Pore volume   | 0.031916 cm <sup>3</sup> /g |
| DDAB-BC       |                             |
| Surface area  | 124.6841 m <sup>2</sup> /g  |
| Pore diameter | 8.75102 nm                  |
| Pore volume   | 0.316780 cm <sup>3</sup> /g |

**Table S2. Composition of BC**

| Components                     | Composition (%)           |
|--------------------------------|---------------------------|
| SiO <sub>2</sub>               | 54-60                     |
| Al <sub>2</sub> O <sub>3</sub> | 21-25                     |
| Fe <sub>2</sub> O <sub>3</sub> | 8.9-9.3                   |
| Cu                             | 0.4-1.54                  |
| MgO                            | 2.23-2.65                 |
| Loss on ignition               | 7.25                      |
| Density                        | 1.23 (g/cm <sup>3</sup> ) |
| Moisture                       | 2.5 %                     |
| Water solubility               | 2.41 %                    |
| pH                             | 7.1                       |

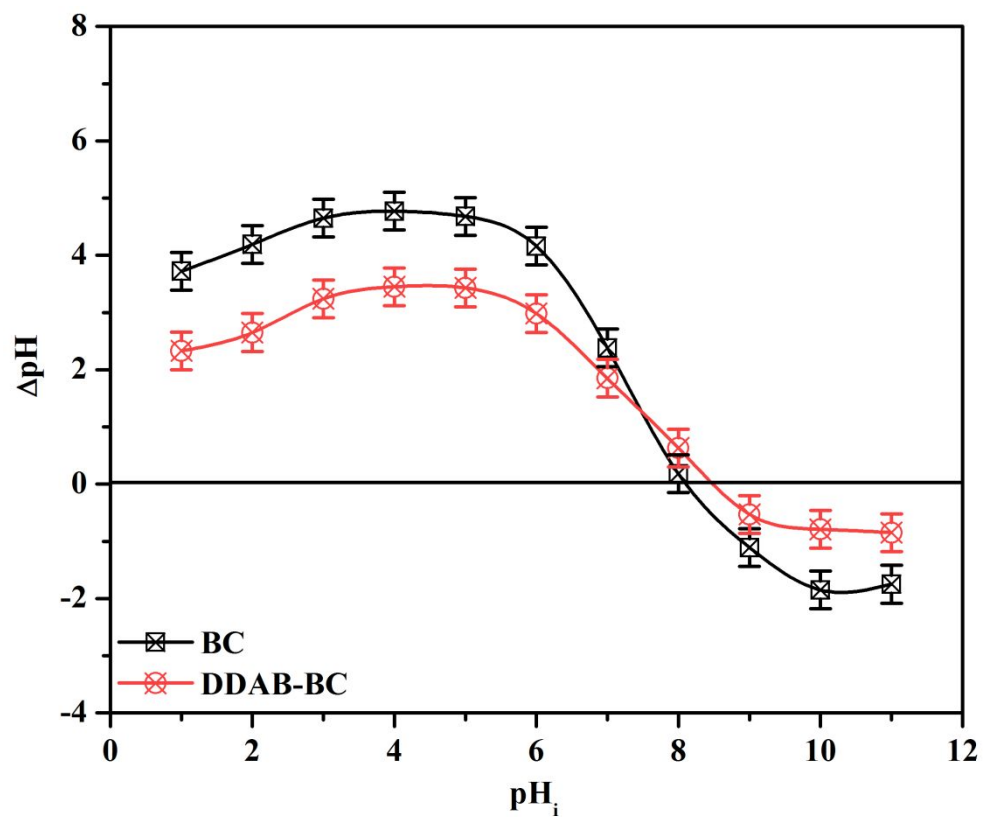

**Figure S3.** The point of zero charge ( $pH_{PZC}$ ) of BC and DDAB-BC sorbents

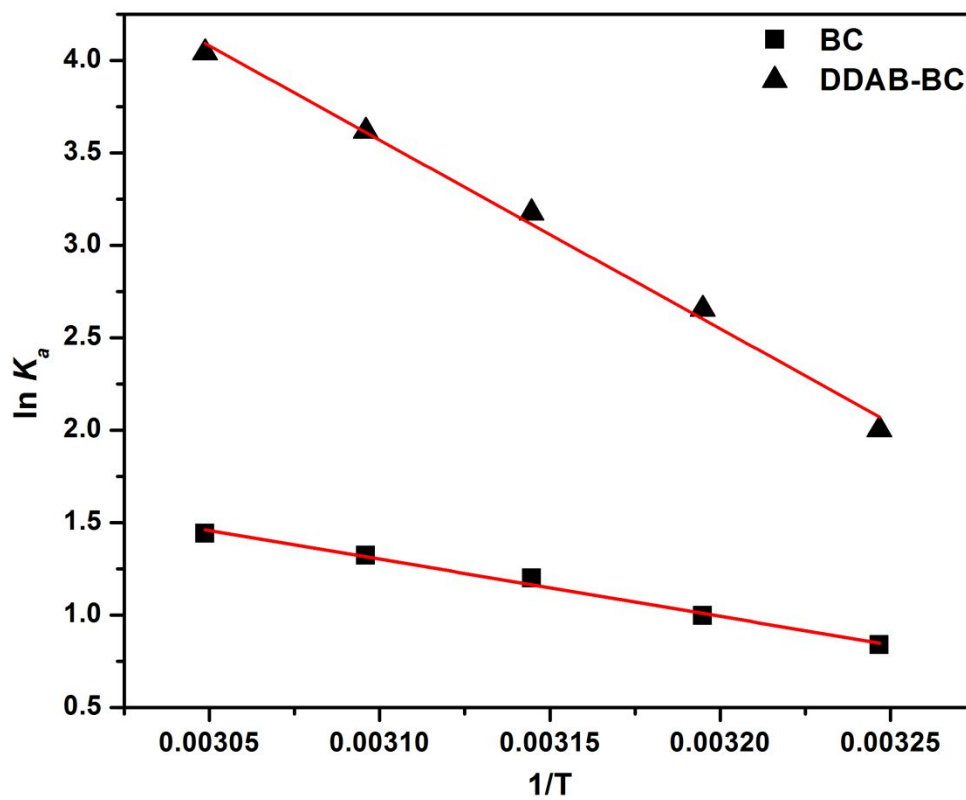

Figure S4. Plots of  $\ln K_a$  vs.  $1/T$  for MB sorption onto BC and DDAB-BC
